# Supplementary material
Source: Springer Nature journal article supplement (https://www.springermedizin.de/resource/supplementary/13041_2012_191_MOESM3_ESM.pdf/25657706)

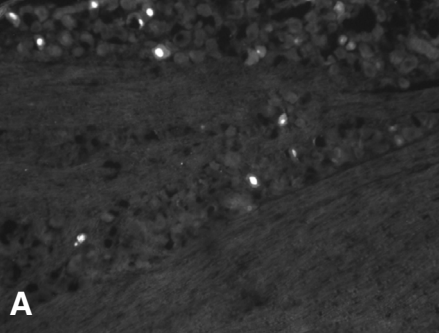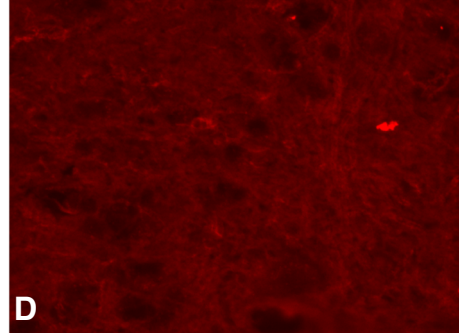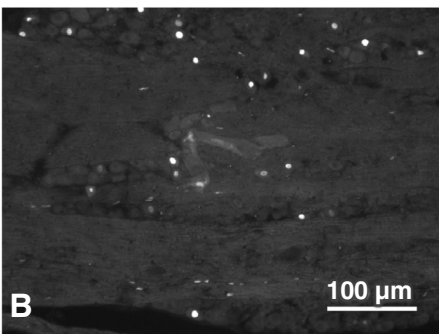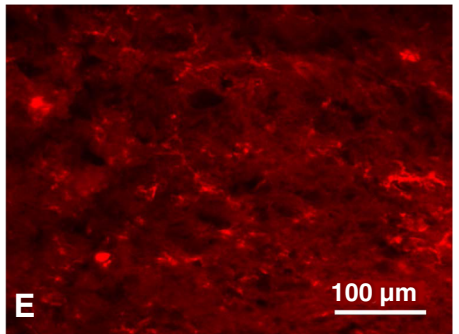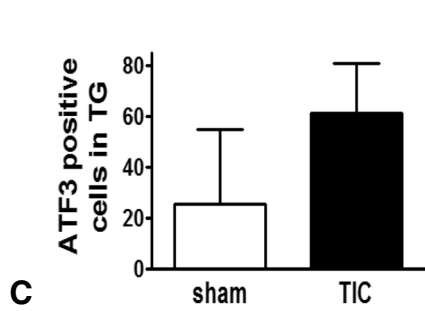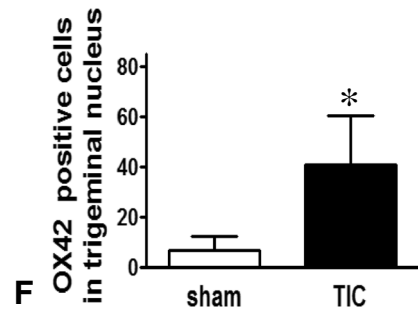

Supplement: MOESM3 [file 25657706]
